# Supplementary material
Source: publisher figshare collection journal article supplement (https://asha.figshare.com/ndownloader/files/24313781)
Supplement: Supplementary file 1 [file 24313781]

Supplemental Material S1. Pattern of hearing screening fails across participants.

|  | **Right Ear** | | | | | | **Left Ear** | | | | | |
| --- | --- | --- | --- | --- | --- | --- | --- | --- | --- | --- | --- | --- |
| **Participant** | 500 | 1000 | 2000 | 4000 | 6000 | 8000 | 500 | 1000 | 2000 | 4000 | 6000 | 8000 |
| TR1 |  |  |  |  | X | X |  |  |  |  | X |  |
| TR2 |  |  |  |  | X | X |  |  |  |  |  |  |
| TR3 |  |  |  |  |  |  |  |  |  |  | X |  |
| TR4 |  |  |  |  | X |  |  |  |  |  | X |  |
| RD1 |  |  |  |  |  | X |  |  |  |  |  |  |
| RD2 |  |  | X |  |  | X |  |  | X |  |  |  |
| RD3 |  |  |  |  |  |  |  |  |  |  |  | X |
| RD4 | X | X | X | X | X | X | X | X |  | X | X | X |
| RD5 |  |  |  |  |  |  |  |  |  |  | X |  |
| RD6 |  |  |  |  | X |  |  |  |  |  |  |  |
| RD7 |  |  |  |  |  |  |  |  |  |  | X |  |
| RD8 |  |  |  |  | X | X |  |  |  |  |  |  |
| RD9 |  |  |  |  |  |  |  |  |  | X |  |  |
| RD10 |  |  |  |  |  |  |  |  | X |  | X |  |
| RD11 |  |  |  |  |  |  |  |  |  |  | X |  |
| RD12 |  |  |  |  |  | X |  |  |  |  |  |  |
| RD13 |  |  |  |  | X |  |  |  |  |  |  |  |
